# Supplementary material
Source: publisher figshare collection journal article supplement (https://sage.figshare.com/ndownloader/files/15460346)
Supplement: Supplementary file 1 [file 15460346]

Appendix 2: Bar graphs regarding non-electoral participation

A2 Figure 1: Level of non-electoral participation by opinions about homosexuality by level of political homophobia with 95 percent confidence intervals.

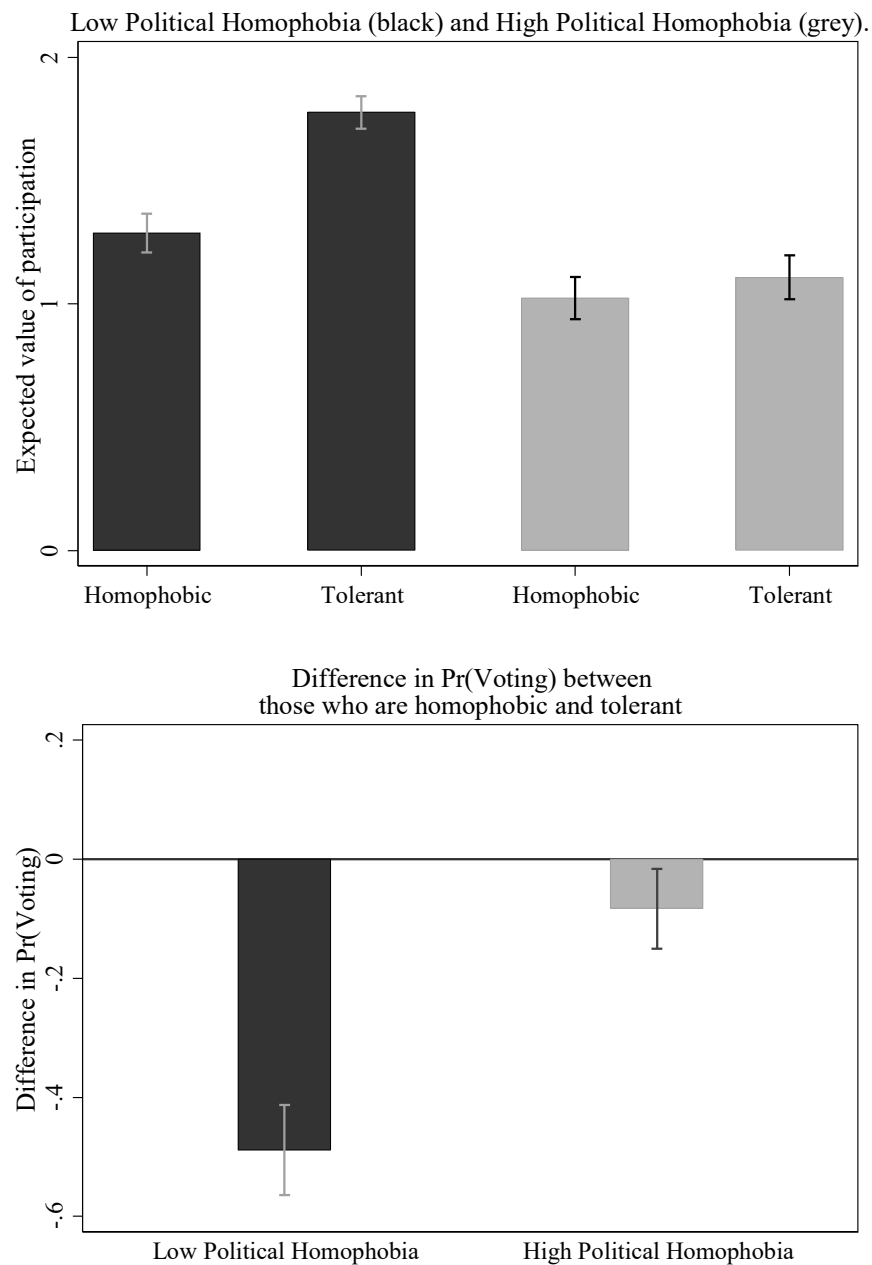

Dependent variable: 0 nonelectoral activities - 7 nonelectoral activities.  
Data source: European Social Survey 2002-2016

A2 Figure 2: Level of non-electoral participation by tolerance towards gay people, education level, and level of political homophobia (high level 'grey' and low level 'black') with 95 percent confidence intervals

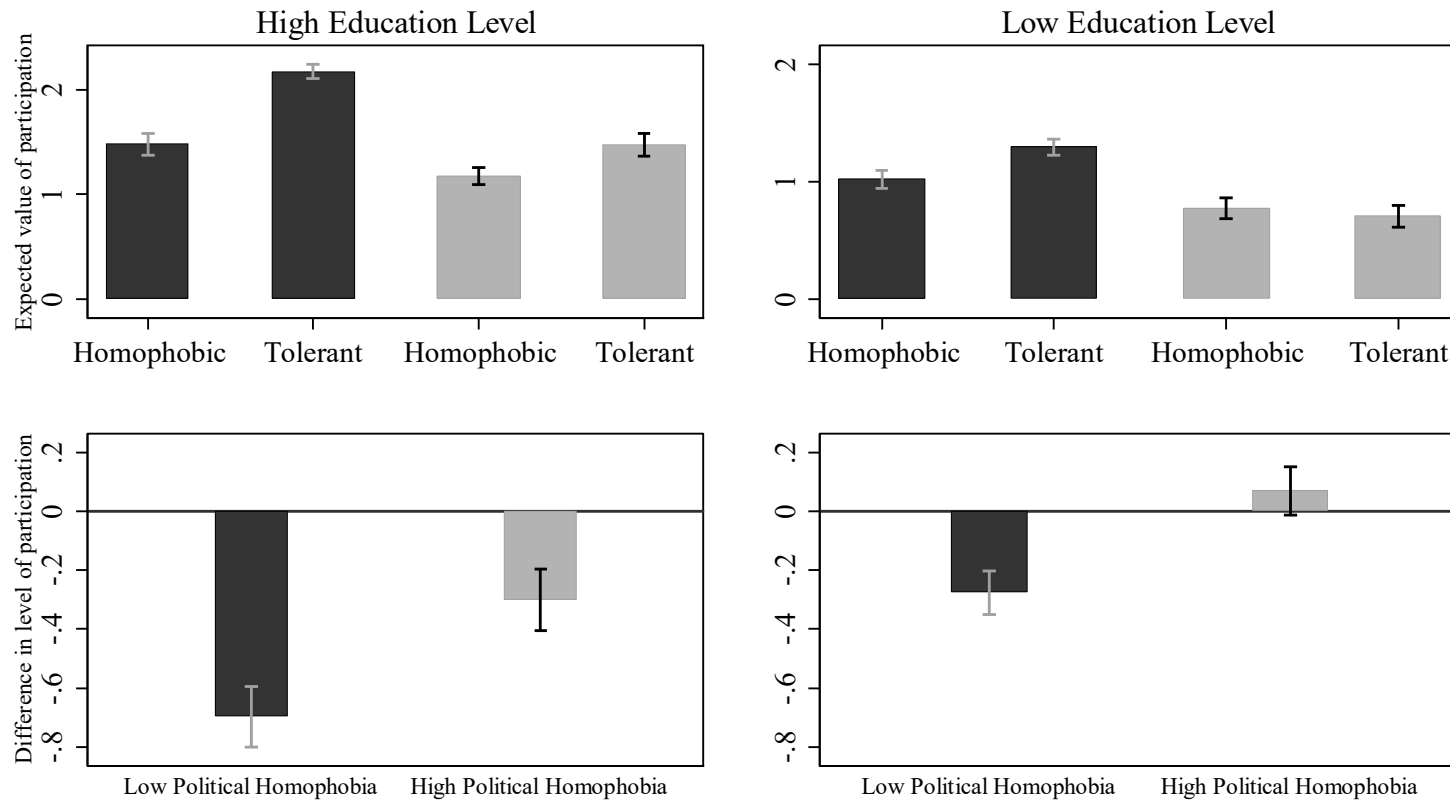

Dependent variable: 0 nonelectoral activities - 7 nonelectoral activities.

Data source: European Social Survey 2002-2016

### Appendix 3: Results with respect to an interaction between left-right ideology and region

A3 Table 1: Effects on voting, using European Social Survey data (2002-2016)

|                                                                                                                                                                                                                                                                                                                                                                                                                                                                                                                                                                                                                                 | Voting                 | Voting                |
|---------------------------------------------------------------------------------------------------------------------------------------------------------------------------------------------------------------------------------------------------------------------------------------------------------------------------------------------------------------------------------------------------------------------------------------------------------------------------------------------------------------------------------------------------------------------------------------------------------------------------------|------------------------|-----------------------|
| Rainbow Index                                                                                                                                                                                                                                                                                                                                                                                                                                                                                                                                                                                                                   | 0.02***<br>(0.003)     | 0.2***<br>(0.007)     |
| Believing gays and lesbians should not live as they wish                                                                                                                                                                                                                                                                                                                                                                                                                                                                                                                                                                        | 0.06**<br>(0.02)       | 0.2***<br>(0.06)      |
| Years of Education                                                                                                                                                                                                                                                                                                                                                                                                                                                                                                                                                                                                              |                        | 0.1***<br>(0.03)      |
| Rainbow Index *Believing gays and lesbians should not live as they wish                                                                                                                                                                                                                                                                                                                                                                                                                                                                                                                                                         | -0.003***<br>(0.0005)  | -0.004***<br>(0.001)  |
| Believing gays and lesbians should not live as they wish* Years of Education                                                                                                                                                                                                                                                                                                                                                                                                                                                                                                                                                    |                        | -0.01***<br>(0.005)   |
| Rainbow Index * Years of Education                                                                                                                                                                                                                                                                                                                                                                                                                                                                                                                                                                                              |                        | -0.0003<br>(0.0004)   |
| Rainbow Index * Years of Education *Believing gays and lesbians should not live as they wish                                                                                                                                                                                                                                                                                                                                                                                                                                                                                                                                    |                        | 0.0001<br>(0.0001)    |
| Age                                                                                                                                                                                                                                                                                                                                                                                                                                                                                                                                                                                                                             | 0.04***<br>(0.001)     | 0.04***<br>(0.001)    |
| Years of Education                                                                                                                                                                                                                                                                                                                                                                                                                                                                                                                                                                                                              | 0.1***<br>(0.007)      |                       |
| Left-Right Ideology                                                                                                                                                                                                                                                                                                                                                                                                                                                                                                                                                                                                             | 0.07***<br>(0.01)      | 0.07***<br>(0.01)     |
| Left-Right Ideology* Rainbow Index                                                                                                                                                                                                                                                                                                                                                                                                                                                                                                                                                                                              | -0.0006***<br>(0.0002) | -0.0006**<br>(0.0002) |
| Constant                                                                                                                                                                                                                                                                                                                                                                                                                                                                                                                                                                                                                        | -2.6***<br>(0.2)       | -3.0***<br>(0.4)      |
| Random Effect for Country-Year                                                                                                                                                                                                                                                                                                                                                                                                                                                                                                                                                                                                  |                        |                       |
| Variance                                                                                                                                                                                                                                                                                                                                                                                                                                                                                                                                                                                                                        | 0.3 (0.03)             | 0.3(0.03)             |
| Residual                                                                                                                                                                                                                                                                                                                                                                                                                                                                                                                                                                                                                        |                        |                       |
| Survey Responses                                                                                                                                                                                                                                                                                                                                                                                                                                                                                                                                                                                                                | 263,036                | 263,036               |
| Dependent variables: Voted (1), Didn't vote (0). Rainbow Index: 0 (gross violations of LGBT rights, discrimination) - 100 (respect of LGBT rights, full equality). Believing gays and lesbians should not live as they wish: 1 (Agreeing strongly that gays and lesbians should be free) – 5 (Disagreeing strongly that gays and lesbians should be free). Lib-Con Ideology: 0 (Left) – 10 (Right). Results calculated using mixed effects logit (Voted) models, with a random effect for country-years. Robust standard errors in parentheses. Data source: European Social Survey (2002-2016). *** p<0.01, ** p<0.05, * p<0.1 |                        |                       |
